# Supplementary material for: Thirty-six Year Trends in Mortality from Diseases of Circulatory System in Korea
Source: PubMed Central journal article supplement — Korean Circ J. 2021 Jan 25;51(4):320–32. doi: 10.4070/kcj.2020.0424 (PMC8022022; doi:10.4070/kcj.2020.0424), 2021-01-25
Supplement: kcj-51-320-s021.pdf [file kcj-51-320-s021.pdf]

# Supplementary Fig. 1. Number of deaths from cardiovascular diseases in men and women.

A

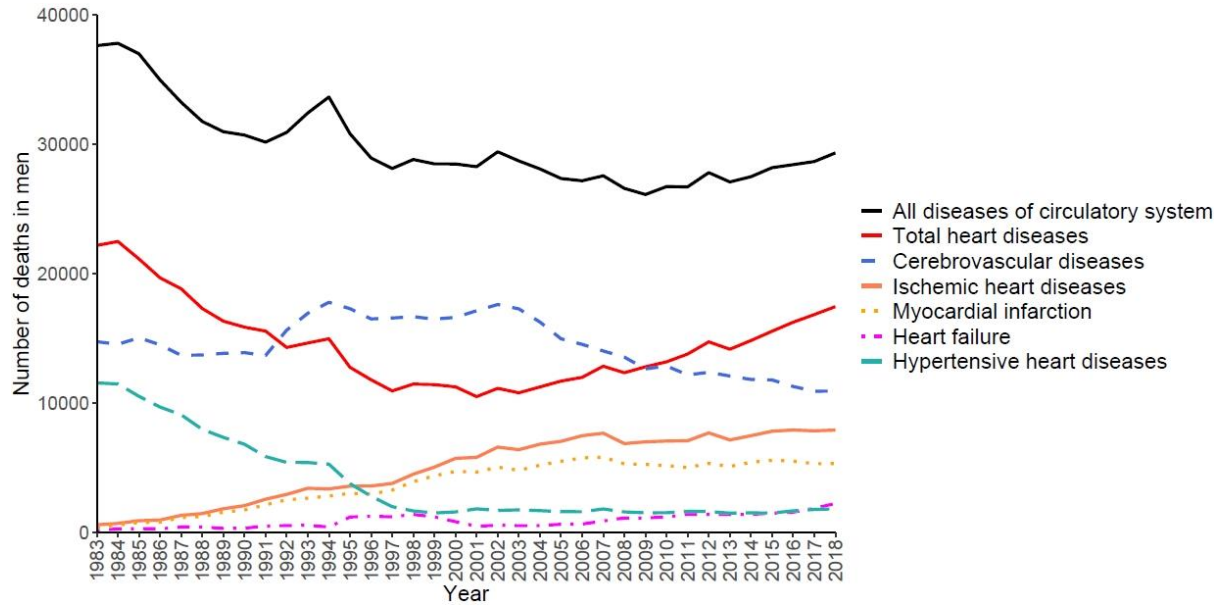

B

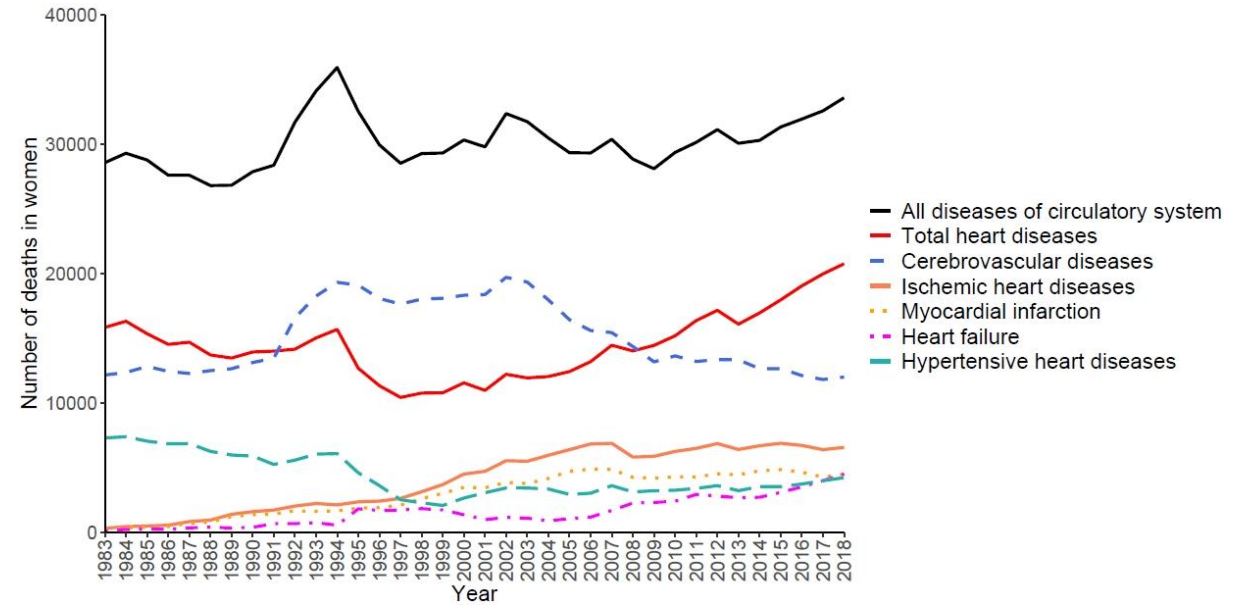

KCD code : All diseases of circulatory system (I00-I99), Total heart diseases (I00-I13, I20-I51), Hypertensive heart diseases (I10-I13), Ischemic heart diseases (I20-I25), Myocardial infarction (I21-I23), Heart failure (I50), Cerebrovascular diseases (I60-I69).
