# Supplementary material for: Thirty-six Year Trends in Mortality from Diseases of Circulatory System in Korea
Source: PubMed Central journal article supplement — Korean Circ J. 2021 Jan 25;51(4):320–32. doi: 10.4070/kcj.2020.0424 (PMC8022022; doi:10.4070/kcj.2020.0424), 2021-01-25
Supplement: kcj-51-320-s022.pdf [file kcj-51-320-s022.pdf]

# Supplementary Fig. 2. Crude, age-standardized, and age-stratified mortality from total heart diseases (I00-I13, I20-I51).

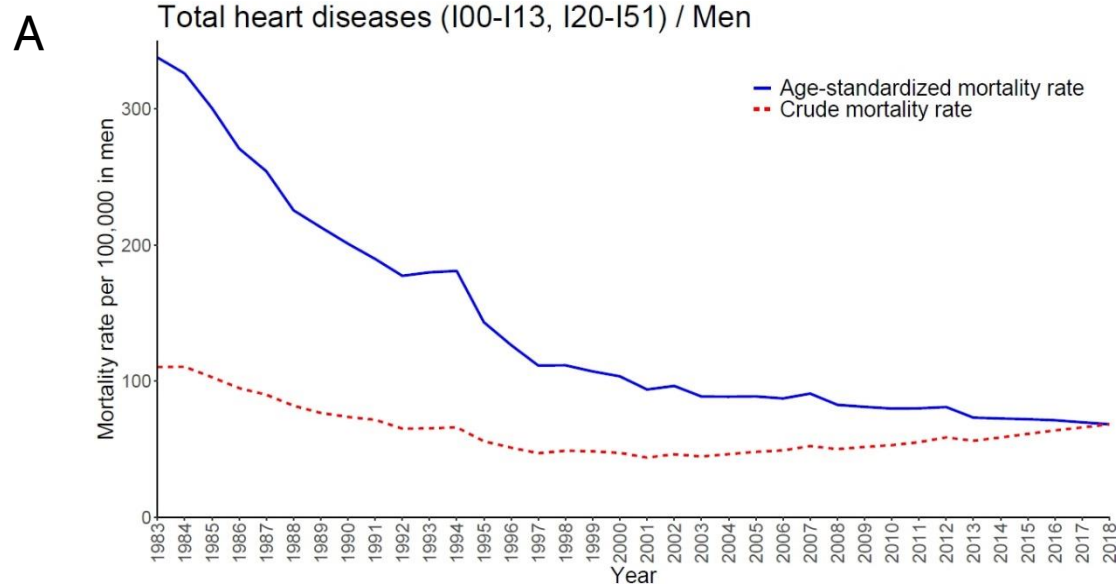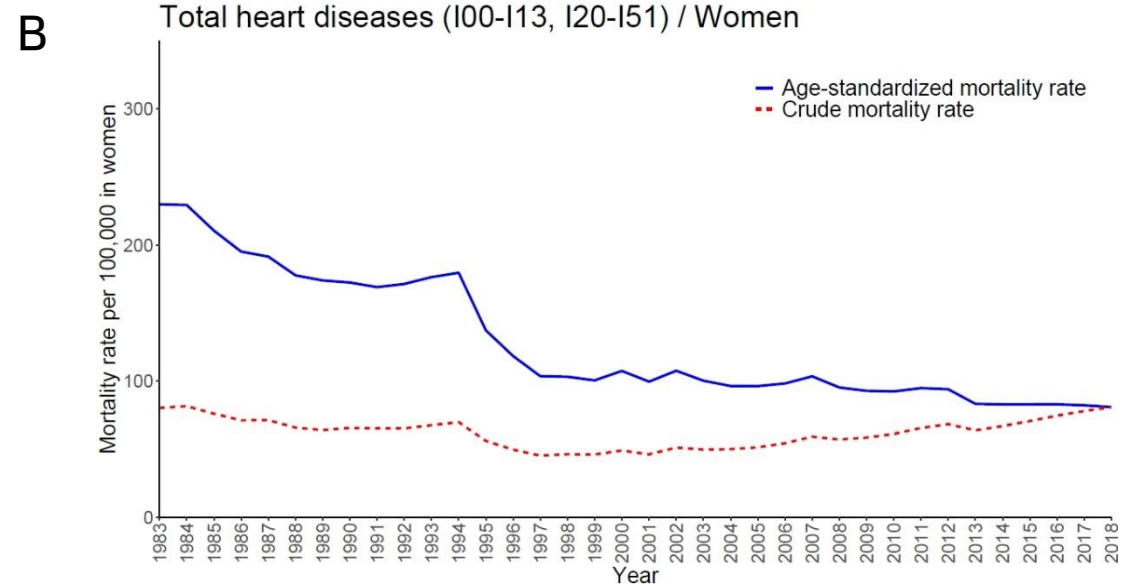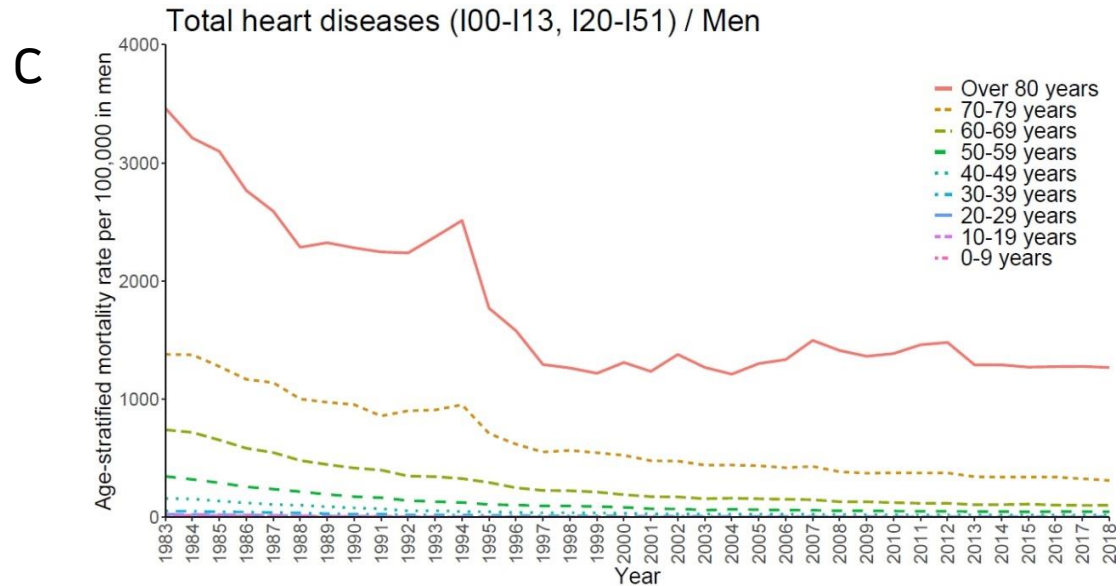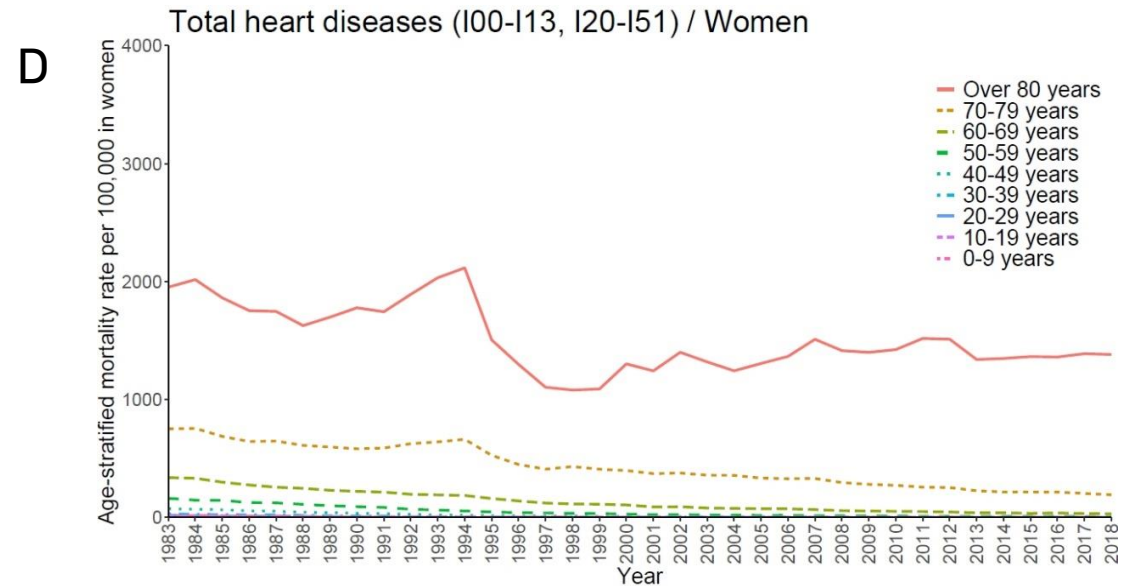

Age distribution of the male Korean population in 2018 was used as the standard population in A (Men).

Age distribution of the female Korean population in 2018 was used as the standard population in B (Women).
